# Supplementary material for: Impact of the COVID-19 pandemic on agriculture in India: Cross-sectional results from a nationally representative survey
Source: PLOS journal article supplement (doi:10.1371/journal.pstr.0000026), 2022-08-18
Supplement: S2 (10.1371/journal.pstr.0000026.s002) [file journal.pstr.0000026.s002]

| **S2 Table.** State-wise agricultural practices during the Kharif season in 2020 and 2019 among land-owning farmers in India. | | | | | | | | | | | | | | | |
| --- | --- | --- | --- | --- | --- | --- | --- | --- | --- | --- | --- | --- | --- | --- | --- |
|  | **Andhra Pradesh** | | | **Assam** | | | **Bihar** | | | **Chhattisgarh** | | | **Gujarat** | | |
| **Change in land cultivated at farm level** | | | | | | | | | | | | | | | |
| Increased | 15.3 | (8.6 | , 25.8) | 57.3 | (42.4 | , 70.9) | 24.3 | (15.8 | , 35.5) | 17.7 | (10.9 | , 27.4) | 5.1 | (2.9 | , 8.9) |
| Decreased | 10.4 | (5.1 | , 20.1) | 1.5 | (0.3 | , 6.9) | 3.6 | (2.1 | , 6.2) | 0 |  |  | 1.4 | (0.5 | , 4.3) |
| No change | 74.3 | (62.7 | , 83.3) | 41.2 | (27.8 | , 56.0) | 72.0 | (61.2 | , 80.8) | 82.3 | (72.6 | , 89.1) | 93.5 | (89.3 | , 96.1) |
| **Cultivating the same crop in 2019 and 2020** | | | | | | | | | | | | | | | |
| No | 11.1 | (5.7 | , 20.5) | 35.6 | (21.5 | , 52.8) | 13.2 | (6.7 | , 24.3) | 9.0 | (5.4 | , 14.5) | 11.6 | (7.9 | , 16.9) |
| Yes | 88.9 | (79.5 | , 94.3) | 64.4 | (47.2 | , 78.5) | 86.8 | (75.7 | , 93.3) | 91.0 | (85.5 | , 94.6) | 88.4 | (83.1 | , 92.1) |
| **Among those who changed crop from 2019 to 2020** | | | | | | | | | | | | | | | |
| Temporary change | 27.7 | (9.3 | , 58.8) | 82.3 | (61.2 | , 93.2) | 40.4 | (13.7 | , 74.3) | 16.1 | (5.2 | , 40.1) | 63.6 | (44.1 | , 79.4) |
| Permanent change | 18.7 | (5.4 | , 48.2) | 9.2 | (2.6 | , 27.5) | 44.0 | (15.2 | , 77.4) | 78.4 | (54.3 | , 91.7) | 7.4 | (1.8 | , 25.9) |
| Don't know | 53.5 | (23.4 | , 81.3) | 8.5 | (2.4 | , 25.7) | 15.7 | (3.1 | , 51.9) | 5.5 | (0.8 | , 30.5) | 29.1 | (15.1 | , 48.6) |
| **Change in fertilizer use from 2019 to 2020** | | | | | | | | | | | | | | | |
| Increased | 24.9 | (15.7 | , 37.1) | 17.9 | (7.3 | , 37.6) | 12.5 | (9.0 | , 17.1) | 30.6 | (18.9 | , 45.5) | 4.8 | (2.5 | , 8.9) |
| Decreased | 18.3 | (10.9 | , 29.2) | 22.0 | (11.1 | , 39.1) | 9.3 | (5.8 | , 14.7) | 23.0 | (14.0 | , 35.4) | 9.1 | (5.8 | , 14.0) |
| No change | 56.8 | (44.8 | , 68.1) | 60.1 | (43.1 | , 74.9) | 78.2 | (71.4 | , 83.8) | 46.4 | (34.6 | , 58.5) | 86.1 | (80.4 | , 90.4) |
| **Change in pesticide use from 2019 to 2020** | | | | | | | | | | | | | | | |
| Increased | 33.7 | (23.1 | , 46.3) | 5.6 | (2.2 | , 13.3) | 15.0 | (9.6 | , 22.7) | 26.1 | (16.0 | , 39.6) | 35.8 | (27.4 | , 45.3) |
| Decreased | 15.5 | (8.4 | , 26.8) | 21.5 | (10.7 | , 38.5) | 5.5 | (3.5 | , 8.7) | 32.5 | (21.2 | , 46.3) | 3.0 | (1.4 | , 6.3) |
| No change | 50.8 | (39.1 | , 62.4) | 72.9 | (56.7 | , 84.7) | 79.5 | (71.6 | , 85.6) | 41.4 | (30.4 | , 53.3) | 61.2 | (51.9 | , 69.8) |
| **Change in labour available from 2019 to 2020** | | | | | | | | | | | | | | | |
| Increased | 11.8 | (6.8 | , 19.8) | 15.8 | (9.0 | , 26.1) | 25.4 | (17.7 | , 35.0) | 11.6 | (6.1 | , 20.8) | 5.5 | (3.1 | , 9.6) |
| Decreased | 36.9 | (25.4 | , 50.1) | 35.3 | (21.3 | , 52.5) | 25.9 | (17.5 | , 36.6) | 27.9 | (18.3 | , 40.1) | 26.9 | (19.1 | , 36.5) |
| No change | 51.3 | (39.5 | , 62.9) | 48.9 | (33.9 | , 64.1) | 48.7 | (38.5 | , 59.0) | 60.5 | (48.1 | , 71.7) | 67.5 | (58.2 | , 75.7) |

| **S2 Table.** Continued. | | | | | | | | | | | | |
| --- | --- | --- | --- | --- | --- | --- | --- | --- | --- | --- | --- | --- |
|  | **Karnataka** | | | **Madhya Pradesh** | | | **Maharashtra** | | | **Odisha** | | |
| **Change in land cultivated at farm level** | | | | | | | | | | | | |
| Increased | 23.8 | (18.5 | , 30.0) | 18.8 | (13.9 | , 24.9) | 8.2 | (3.4 | , 18.6) | 49.5 | (39.2 | , 59.9) |
| Decreased | 2.3 | (0.9 | , 6.2) | 0.4 | (0.1 | , 1.7) | 1.3 | (0.4 | , 4.1) | 4.4 | (2.0 | , 9.2) |
| No change | 73.9 | (67.5 | , 79.4) | 80.7 | (74.6 | , 85.7) | 90.5 | (80.5 | , 95.6) | 46.1 | (35.9 | , 56.7) |
| **Cultivating the same crop in 2019 and 2020** | | | | | | | | | | | | |
| No | 47.7 | (41.0 | , 54.5) | 7.8 | (5.0 | , 12.0) | 13.5 | (8.1 | , 21.6) | 9.9 | (6.1 | , 15.6) |
| Yes | 52.3 | (45.5 | , 59.0) | 92.2 | (88.0 | , 95.0) | 86.5 | (78.4 | , 91.9) | 90.1 | (84.4 | , 93.9) |
| **Change in crop permanent or temporary** | | | | | | | | | | | | |
| Temporary change | 5.8 | (2.7 | , 12.0) | 31.0 | (16.2 | , 51.0) | 31.5 | (9.2 | , 67.6) | 73.0 | (48.7 | , 88.5) |
| Permanent change | 22.1 | (15.8 | , 30.0) | 59.8 | (38.9 | , 77.7) | 33.8 | (16.6 | , 56.7) | 21.6 | (8.2 | , 45.9) |
| Don't know | 72.1 | (63.4 | , 79.4) | 9.2 | (2.8 | , 26.1) | 34.7 | (17.5 | , 57.3) | 5.5 | (0.8 | , 30.3) |
| **Change in fertilizer use from 2019 to 2020** | | | | | | | | | | | | |
| Increased | 10.9 | (7.7 | , 15.3) | 13.2 | (10.1 | , 17.2) | 4.1 | (2.2 | , 7.4) | 21.6 | (15.5 | , 29.3) |
| Decreased | 25.8 | (20.9 | , 31.4) | 47.9 | (40.8 | , 55.1) | 16.8 | (9.9 | , 27.1) | 30.9 | (21.5 | , 42.4) |
| No change | 63.3 | (57.0 | , 69.1) | 38.8 | (31.7 | , 46.5) | 79.1 | (69.2 | , 86.5) | 47.5 | (37.2 | , 58.0) |
| **Change in pesticide use from 2019 to 2020** | | | | | | | | | | | | |
| Increased | 18.0 | (12.7 | , 24.7) | 17.6 | (13.7 | , 22.4) | 7.6 | (3.8 | , 14.4) | 18.4 | (11.0 | , 29.3) |
| Decreased | 26.9 | (21.7 | , 32.8) | 42.9 | (35.9 | , 50.2) | 7.8 | (5.1 | , 11.8) | 47.7 | (37.3 | , 58.2) |
| No change | 55.2 | (48.4 | , 61.8) | 39.4 | (32.4 | , 47.0) | 84.6 | (77.7 | , 89.6) | 33.9 | (25.7 | , 43.2) |
| **Change in labour available from 2019 to 2020** | | | | | | | | | | | | |
| Increased | 10.6 | (6.6 | , 16.6) | 12.4 | (9.4 | , 16.2) | 6.0 | (2.4 | , 14.1) | 36.8 | (27.8 | , 46.8) |
| Decreased | 24.5 | (19.5 | , 30.2) | 49.4 | (42.2 | , 56.6) | 13.0 | (7.7 | , 21.1) | 45.0 | (34.5 | , 55.9) |
| No change | 64.9 | (58.3 | , 71.0) | 38.2 | (31.2 | , 45.6) | 81.0 | (71.7 | , 87.8) | 18.2 | (12.6 | , 25.5) |

| **S2 Table.** Continued. | | | | | | | | | | | | |
| --- | --- | --- | --- | --- | --- | --- | --- | --- | --- | --- | --- | --- |
|  | **Rajasthan** | | | **Tamil Nadu** | | | **Uttar Pradesh** | | | **West Bengal** | | |
| **Change in land cultivated at farm level** | | | | | | | | | | | | |
| Increased | 24.5 | (17.3 | , 33.5) | 10.5 | (6.9 | , 15.8) | 11.7 | (7.5 | , 17.6) | 27.0 | (21.4 | , 33.4) |
| Decreased | 2.2 | (1.1 | , 4.3) | 0.4 | (0.1 | , 3.0) | 0.4 | (0.1 | , 1.7) | 2.4 | (0.9 | , 6.1) |
| No change | 73.3 | (64.4 | , 80.6) | 89.0 | (83.7 | , 92.8) | 87.9 | (82.0 | , 92.1) | 70.7 | (64.1 | , 76.4) |
| **Cultivating the same crop in 2019 and 2020** | | | | | | | | | | | | |
| No | 21.8 | (15.2 | , 30.2) | 14.0 | (8.3 | , 22.8) | 12.3 | (7.9 | , 18.5) | 19.8 | (15.1 | , 25.5) |
| Yes | 78.2 | (69.8 | , 84.8) | 86.0 | (77.2 | , 91.7) | 87.7 | (81.5 | , 92.1) | 80.2 | (74.5 | , 84.9) |
| **Change in crop permanent or temporary** | | | | | | | | | | | | |
| Temporary change | 43.6 | (26.5 | , 62.4) | 34.9 | (16.3 | , 59.6) | 32.6 | (17.9 | , 51.8) | 85.5 | (74.3 | , 92.3) |
| Permanent change | 37.2 | (20.2 | , 58.2) | 62.8 | (37.9 | , 82.4) | 52.2 | (30.6 | , 72.9) | 11.1 | (5.5 | , 21.1) |
| Don't know | 19.1 | (9.1 | , 35.8) | 2.2 | (0.3 | , 15.1) | 15.2 | (6.9 | , 30.3) | 3.4 | (0.8 | , 13.4) |
| **Change in fertilizer use from 2019 to 2020** | | | | | | | | | | | | |
| Increased | 6.0 | (3.0 | , 11.6) | 20.9 | (14.7 | , 28.8) | 16.0 | (11.5 | , 21.8) | 39.3 | (33.3 | , 45.5) |
| Decreased | 17.1 | (11.0 | , 25.6) | 22.2 | (16.5 | , 29.3) | 9.5 | (7.0 | , 12.9) | 10.4 | (7.2 | , 14.8) |
| No change | 6.0 | (3.0 | , 11.6) | 56.9 | (47.9 | , 65.4) | 74.4 | (68.4 | , 79.6) | 50.4 | (44.0 | , 56.8) |
| **Change in pesticide use from 2019 to 2020** | | | | | | | | | | | | |
| Increased | 6.7 | (3.0 | , 14.2) | 21.4 | (15.0 | , 29.6) | 13.4 | (9.9 | , 17.8) | 36.1 | (30.0 | , 42.6) |
| Decreased | 11.7 | (6.9 | , 19.2) | 24.7 | (18.0 | , 32.9) | 11.3 | (8.2 | , 15.5) | 11.2 | (7.7 | , 16.0) |
| No change | 81.6 | (72.9 | , 88.0) | 53.9 | (44.7 | , 62.8) | 75.3 | (69.8 | , 80.1) | 52.8 | (46.3 | , 59.2) |
| **Change in labour available from 2019 to 2020** | | | | | | | | | | | | |
| Increased | 10.5 | (6.0 | , 17.9) | 5.0 | (2.7 | , 9.1) | 16.9 | (12.6 | , 22.2) | 36.7 | (30.6 | , 43.2) |
| Decreased | 22.9 | (15.1 | , 33.2) | 21.9 | (16.3 | , 28.7) | 11.9 | (9.0 | , 15.6) | 24.9 | (19.8 | , 30.7) |
| No change | 66.6 | (56.5 | , 75.3) | 73.1 | (65.7 | , 79.4) | 71.2 | (65.4 | , 76.4) | 38.4 | (32.5 | , 44.8) |
