# Supplementary material for: Impact of the COVID-19 pandemic on agriculture in India: Cross-sectional results from a nationally representative survey
Source: PLOS journal article supplement (doi:10.1371/journal.pstr.0000026), 2022-08-18
Supplement: S5 (10.1371/journal.pstr.0000026.s005) [file journal.pstr.0000026.s005]

| **S5 Table.** Summary of missing data. | |
| --- | --- |
| **Variable** | **Missing** |
| State | 0% (0) |
| Residence | 0% (0) |
| Gender of the primary income earner | 0% (0) |
| Age | 0% (0) |
| Household size | 0% (0) |
| Caste | 0% (0) |
| Ration or BPL Card | 0% (0) |
| Farm size* | 0.03% (1) |
| Land owned | 4.8% (157)† |
| Land cultivated in 2020 | 0% (0) |
| Land cultivated in 2019 | 0% (0) |
| Change in land cultivated at farm level | 0% (0) |
| Change in land cultivated at village level | 0% (0) |
| Cultivating the same crop in 2019 and 2020 | 0% (0) |
| Change in crop cultivated from 2019 to 2020 temporary or permanent | 0% (0) |
| Change in fertilizer use from 2019 to 2020 | 0% (0) |
| Change in pesticide use from 2019 to 2020 | 0% (0) |
| Change in labour available from 2019 to 2020 | 0% (0) |
| Crop type in 2020 | 0% (0) |
| Crop type in 2019 | 0% (0) |
| Crop type in kitchen garden | 0% (0) |
| Reason for change in extent of land cultivated at farm level | 1.3% (9) |
| Reason for change in extent of land cultivated at village level | 0% (0) |
| Reason for continuing with the same crop | 0% (0) |
| Reason for cultivating a different crop | 0% (0) |
| Reason for change in fertiliser use | 0% (0) |
| Reason for change in pesticide use | 0% (0) |
| Received cash under PM-Kisan | 0% (0) |
| Problem in accessing bank credit | 0% (0) |
| Delay in loan sanctioning | 0% (0) |
| Could not repay last year’s loan | 0% (0) |
| No collateral | 0% (0) |
| Kitchen garden for home consumption | 0% (0) |
| Coping strategies | 0% (0) |
| Currently follow agroecological practices | 0% (0) |
| Interested in trying agroecological practices | 0% (0) |
| Reason for interest in trying agroecological practices | 0% (0) |
| Able to find work in Kharif 2020 | 0% (0) |
| What work: Agricultural labourer | 0% (0) |
| What work: NREGA | 0% (0) |
| Change in number of days employed as an agricultural labourer | 0% (0) |
| Change in wage rate for agricultural labourer | 0% (0) |
| Support received in past 3 months | 0% (0) |
| Kitchen garden for home consumption (agricultural labourers) | 0% (0) |
| Worried about food in past month | 0% (0) |
| Ate less than usual in past month | 0% (0) |
| Skipped a meal in past month | 0% (0) |
| Went without eating for a whole day in past month | 0% (0) |
| Grains | 0% (0) |
| Potatoes | 0% (0) |
| Pulses | 0% (0) |
| Nuts | 0% (0) |
| Meat | 0% (0) |
| Poultry | 0% (0) |
| Fish | 0% (0) |
| Dairy | 0% (0) |
| Eggs | 0% (0) |
| Vegetables | 0% (0) |
| Fruit | 0% (0) |
| Cough | 0% (0) |
| Fever | 0% (0) |
| Shortness of breath | 0% (0) |
| Impact on their work owing to some health issues | 0% (0) |
| Values are unweighted % (n).  * Due to an error in the survey skip pattern, we did not collect amount of land owned for the n=157 respondents who only cultivated in 2020 (but not in 2019). For these 157 participants, farm size was based on the amount of land cultivated in 2020 rather than amount of land owned.  † Missing due to an error in the survey skip pattern. | |
